# Supplementary material
Source: bioRxiv or medRxiv preprint supplement (https://medrxiv.org/content/medrxiv/early/2021/09/07/2021.09.02.21262599/DC1/embed/media-1.pdf)
Supplement: Supplementary file [file media-1.pdf]

## Supplemental Materials

### Supplemental Table 1 - Blood biochemistry at admission and at follow up; time variable

| Biochemical Parameter                |                         | Mild<br>(N = 38, 23%)           | Moderate<br>(N = 29, 17%)        | Severe<br>(N = 101, 60%)         |
|--------------------------------------|-------------------------|---------------------------------|----------------------------------|----------------------------------|
| WBC count<br>(x10 <sup>3</sup> / μL) | Admission               | 5.6 (4.5-8.1)                   | 7.1 (4.9-8.5)                    | 7.8 (6.0-11.6)                   |
|                                      | Follow-up               | 6.4 (5.4-7.5)                   | 6.5 (5.1-7.5)                    | 7.2 (6.2-8.8)                    |
|                                      | Difference <sup>#</sup> | 0.3 [95% CI -0.6 to 1.8]        | 0.05 [95% CI -0.9 to 1.5]        | -0.6 95% CI [-2.0 to -0.5] *     |
| CRP (mg/l)                           | Admission               | 34.4 (16.9-88.1)                | 79.5 (18.3-128.1)                | 99.2 (51.6-147.2)                |
|                                      | Follow-up               | 2.6 (0.7-8.6)                   | 4.1 (0.9-16.6)                   | 5.7 (2.5-18.9)                   |
|                                      | Difference <sup>#</sup> | -30.3 [95% CI -64.8 to -14.5] * | -54.0 [95% CI -105.9 to -13.3] * | -84.1 [95% CI -111.2 to -66.1] * |
| LDH (U/l)                            | Admission               | 250 (226-321)                   | 362 (285-434)                    | 427 (335-603)                    |
|                                      | Follow-up               | 185 (167-236)                   | 251 (182-267)                    | 243 (206-346)                    |
|                                      | Difference <sup>#</sup> | -82 [95% CI -170 to -19] *      | -155 [95% CI -290 to -8] *       | -223 [95% CI -353 to -176] *     |
| RBC count<br>(x10 <sup>5</sup> / μL) | Admission               | 4.7 ± 0.7                       | 4.7 ± 0.6                        | 4.6 ± 0.6                        |
|                                      | Follow-up               | 4.7 ± 0.7                       | 4.7 ± 0.7                        | 4.5 ± 0.6                        |
|                                      | Difference <sup>#</sup> | -0.02 [95% CI -0.30 to 0.19]    | 0.05 [95% CI -0.15 to 0.28]      | 0.02 [95% CI -0.17 to 0.17]      |
| Neutrophils %                        | Admission               | 73.0 ± 11.4                     | 77.3 ± 10.9                      | 83.2 ± 9.0                       |
|                                      | Follow-up               | 59.5 ± 10.5                     | 57.0 ± 10.0                      | 60.1 ± 12.3                      |
|                                      | Difference <sup>#</sup> | -14.3 [95% CI -15.7 to -5.8] *  | -26.0 [95% CI -28.9 to -19.2] *  | -23.1 [95% CI -25.9 to -20.2] *  |
| Lymphocytes %                        | Admission               | 14.5 (11.3-24.8)                | 15.0 (11.2-18.3)                 | 9.5 (6.2-14.7)                   |
|                                      | Follow-up               | 30.3 (22.2-36.6)                | 31.2 (27.1-39.5)                 | 29.6 (22.3-38.9)                 |
|                                      | Difference <sup>#</sup> | 10.1 [95% CI 5.1 to 16.2] *     | 20.9 [95% CI 14.7 to 23.1] *     | 17.9 [95% CI 14.8 to 21.5] *     |
| NLR                                  | Admission               | 5.5 (2.5-8.1)                   | 5.8 (5.1-10.3)                   | 9.3 (5.7-16.6)                   |
|                                      | Follow-up               | 1.9 (1.4-2.9)                   | 1.9 (1.3-2.3)                    | 2.2 (1.3-3.2)                    |
|                                      | Difference <sup>#</sup> | -2.7 [95% CI -4.1 to -1.5] *    | -4.1 [95% CI -5.5 to -3.5] *     | -6.6 [95% CI -9.9 to -5.5] *     |
| PLT (x10 <sup>3</sup> / μL)          | Admission               | 182 (156-266)                   | 163 (136-256)                    | 215 (184-303)                    |
|                                      | Follow-up               | 247 (201-278)                   | 236 (192-285)                    | 247 (209-292)                    |
|                                      | Difference <sup>#</sup> | 51 [95% CI 20 to 74] *          | 40 [95% CI 4 to 84] *            | 21 [95% CI -1 to 50] *           |
| Monocytes %                          | Admission               | 7.7 (5.4-11.2)                  | 5.6 (3.9-6.8)                    | 4.5 (3.4-6.5)                    |
|                                      | Follow-up               | 8.4 (7.2-10.3)                  | 8.2 (7.0-9.5)                    | 8.0 (6.4-9.5)                    |
|                                      | Difference <sup>#</sup> | -0.5 [95% CI -1.5 to 1.5]       | 1.9 [95% CI 1.1 to 4.4] *        | 2.8 [95% CI 2.0 to 3.4] *        |
| ALT (U/l)                            | Admission               | 42 (29-74)                      | 48 (37-68)                       | 60 (44-85)                       |
|                                      | Follow-up               | 36 (27-49)                      | 34 (27-43)                       | 39 (29-47)                       |
|                                      | Difference <sup>#</sup> | -9 [95% CI -27 to 2]            | -15 [95% CI -21 to 7]            | -15 [95% CI -31 to -5] *         |
| AST (U/l)                            | Admission               | 33 (26-63)                      | 48 (34-62)                       | 51 (38-67)                       |
|                                      | Follow-up               | 23 (20-28)                      | 23 (17-27)                       | 23 (19-27)                       |
|                                      | Difference <sup>#</sup> | -9 [95% CI -27 to -2] *         | -25 [95% CI -36 to -10] *        | -25 [95% CI -35 to -20] *        |
| Basophils, %                         | Admission               | 0.20 (0.15-0.24)                | 0.17 (0.11-0.28)                 | 0.14 (0.10-0.20)                 |
|                                      | Follow-up               | 0.40 (0.26-0.56)                | 0.40 (0.30-0.50)                 | 0.35 (0.28-0.47)                 |
|                                      | Difference <sup>#</sup> | 0.27 [95% CI 0.10 to 0.40] *    | 0.20 [95% CI 0.10 to 0.30] *     | 0.20 [0.16 to 0.25] *            |

**Supplemental Table 1 - Blood biochemistry at admission and at follow up; time variable (continued)**

|                     |                         |                              |                               |                                 |
|---------------------|-------------------------|------------------------------|-------------------------------|---------------------------------|
| Eosinophil, %       | Admission               | 0.20 (0.00-0.38)             | 0.07 (0.00-0.21)              | 0.10 (0.04-0.22)                |
|                     | Follow-up               | 1.8 (1.1-2.9)                | 1.6 (1.0-2.4)                 | 1.8 (0.9-2.8)                   |
|                     | Difference <sup>#</sup> | 1.44 [95%CI 0.96 to 1.90] *  | 1.40 [95% CI 0.95 to 2.00] *  | 1.34 [95% CI 1.00 to 2.00] *    |
| Haemoglobin (g/dl)  | Admission               | 14.1 (12.5-14.6)             | 13.3 (12.2-14.7)              | 13.4 (12.3-14.4)                |
|                     | Follow-up               | 13.8 (12.5-14.7)             | 13.8 (11.7-14.4)              | 13.2 (11.8-14.3)                |
|                     | Difference <sup>#</sup> | -0.1 [95% CI -0.7 to 0.6]    | 0.1 [95% CI -0.8 to 0.6]      | -0.03 [95% CI -0.5 to 0.4]      |
| D-dimer (ng/mL)     | Admission               | 830 (380-1253)               | 780 (590-1720)                | 1180 (625-2265)                 |
|                     | Follow-up               | 315 (190.0-455)              | 450 (280-1220)                | 600 (283-1168)                  |
|                     | Difference <sup>#</sup> | -550 [95% CI -855 to -120] * | -280 [95% CI -2345 to 155]    | -630 [95% CI -1075 to -410] *   |
| Haematocrit         | Admission               | 40.3 (36.6-42.7)             | 39.5 (36.1-42.4)              | 39.0 (35.8-41.8)                |
|                     | Follow-up               | 39.7 (36.5-42.8)             | 40.4 (36.3-42.6)              | 38.6 (35.0-41.8)                |
|                     | Difference <sup>#</sup> | 0.4 [95% CI -2.1 to 1.4]     | 2.3 [95% CI -1.8 to 3.3]      | 0.33 [95% CI -1.2 to 1.5]       |
| Fibrinogen (g/l)    | Admission               | 4.0 (3.5-5.9)                | 4.7 (3.0-6.3)                 | 5.4 (3.8-8.0)                   |
|                     | Follow-up               | 2.9 (2.7-3.6)                | 2.8 (2.3-3.2)                 | 3.1 (2.7-4.3)                   |
|                     | Difference <sup>#</sup> | -0.6 [95% CI -3.0 to -0.3] * | -2.3 [95% CI -5.7 to -0.2] *  | -1.5 [95% CI -2.6 to -0.4] *    |
| Ferritin (ng/ml)    | Admission               | 515 (281-780)                | 641 (257-1635)                | 1262 (588-1650)                 |
|                     | Follow-up               | 226 (78-393)                 | 257 (97-425)                  | 432 (170-916)                   |
|                     | Difference <sup>#</sup> | -110 [95% CI -931 to 173]    | -481 [95% CI -1541 to 400]    | -527 [95% CI -1023 to -293] *   |
| IL-6 (pg/ml)        | Admission               | 10.0 (4.2-21.2)              | 17.4 (5.3-36.8)               | 27.1 (9.3-56.5)                 |
|                     | Follow-up               | 2.0 (0.7-8.7)                | 3.7 (0.5-216.6)               | 5.1 (1.7-28.9)                  |
|                     | Difference <sup>#</sup> | -4.4 [95% CI -37.5 to 1.9]   | -5.2 [95% CI -55.9 to 376.8]  | -25.5 [95% CI -59.1 to -1.9] *  |
| SII                 | Admission               | 954 (402-2218)               | 982 (664-1883)                | 2214 (1178-4324)                |
|                     | Follow-up               | 453 (313-693)                | 428 (254-622)                 | 512 (308-855)                   |
|                     | Difference <sup>#</sup> | -401 [95% CI -874 to 2.3] *  | -678 [95% CI -1165 to -356] * | -1392 [95% CI -2073 to -1071] * |
| Urea (mmol/L)       | Admission               | 4.9 (3.9-7.0)                | 6.3 (5.0-8.2)                 | 5.7 (4.1-7.5)                   |
|                     | Follow-up               | 4.9 (3.6-6.3)                | 4.3 (3.6-5.3)                 | 4.8 (3.6-5.7)                   |
|                     | Difference <sup>#</sup> | -0.1 [95% CI -0.6 to 0.7]    | -0.7 [95% CI -1.9 to 0.6]     | -1.4 [95% CI -2.4 to -1.0] *    |
| Creatinine (µmol/L) | Admission               | 81.1 (69.1-92.2)             | 77.9 (60.6-91.3)              | 80.0 (67.6-98.3)                |
|                     | Follow-up               | 77.4 (65.7-87.2)             | 67.3 (55.6-84.2)              | 67.0 (55.0-81.5)                |
|                     | Difference <sup>#</sup> | -0.04 [95% CI -10.1 to 4.7]  | -9.5 [95% CI -15.2 to 5.0] *  | -14.3 [95% CI -18.7 to -11.6] * |

Data are presented as median (interquartile range) or mean  $\pm$  (standard deviation). <sup>#</sup>Differences shown are mean or median differences + 95% confidence interval between admission and follow-up matched values. Asterisk \* indicates a p-value < 0.05.

CRP, C-reactive protein; IL6, interleukin-6; ALT, alanine aminotransferase; AST, aspartate aminotransferase, LDH, lactate dehydrogenase, WBC, white blood cell count; RBC, red blood cell count; SII, systemic immune-inflammation index; NLR, neutrophil-to-lymphocyte ratio.
